# Supplementary material for: 25-HC decreases the sensitivity of human gastric cancer cells to 5-fluorouracil and promotes cells invasion via the TLR2/NF-κB signaling pathway
Source: PubMed Central journal article supplement — Int J Oncol. 2019 Jan 11;54(3):966–80. doi: 10.3892/ijo.2019.4684 (PMC6365050; doi:10.3892/ijo.2019.4684), 2019-01-11

Figure S1. 25-HC has no effects on the expressions of stem cell markers in AGS cells. (A) AGS cells were treated with the indicated concentrations of 25-HC for 48 h before the cells were collected and stained with anti-CD44-FITC before the fluorescence staining was assessed by flow cytometry. (B) AGS cells were treated with the indicated concentrations of 25-HC for 24 h before the cells were collected, RNA was extracted for RT-qPCR to determine the mRNA expression levels of CD44, Sox2, ALDH1A1 and KLF4. Results were obtained from 3 independent experiments and are expressed as the means  $\pm$  SEM. Representative images are presented.

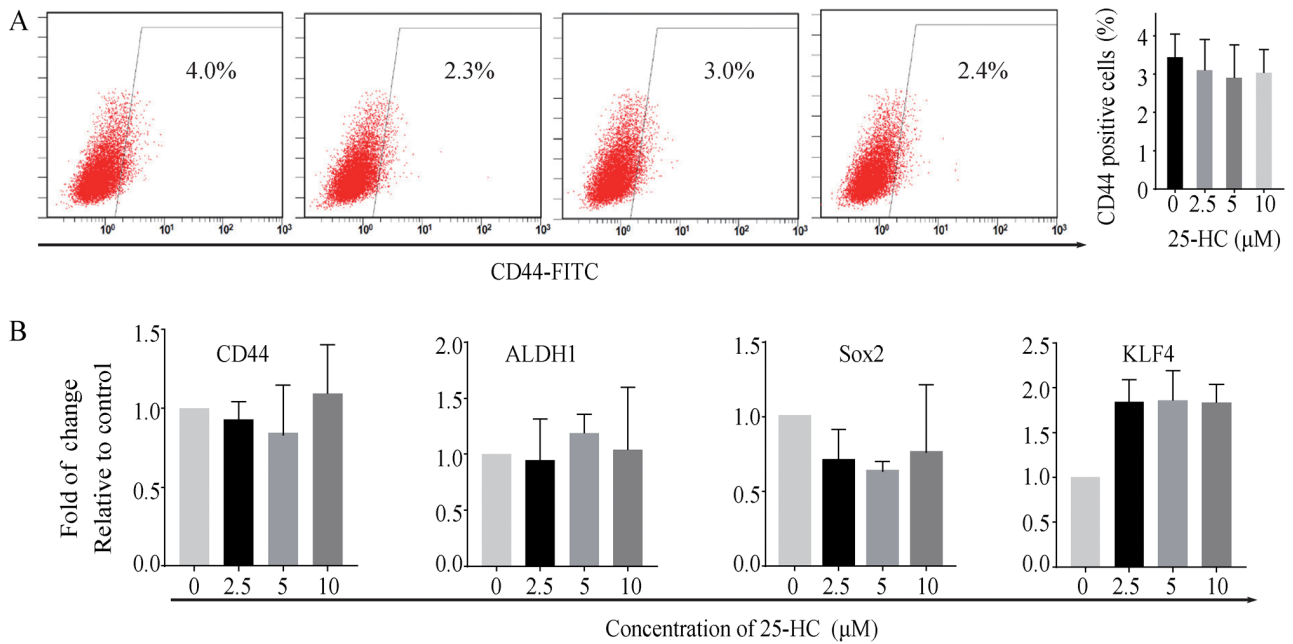

Supplement: Supplementary_Data.pdf [file Supplementary_Data.pdf]
